# Supplementary material for: CXCR4 hyperactivation cooperates with TCL1 in CLL development and aggressiveness
Source: PubMed Central journal article supplement (PMC8478649; doi:10.1038/s41375-021-01376-1), 2021-08-06
Supplement: 41375_2021_1376_MOESM5_ESM.pdf [file 41375_2021_1376_MOESM5_ESM.pdf]

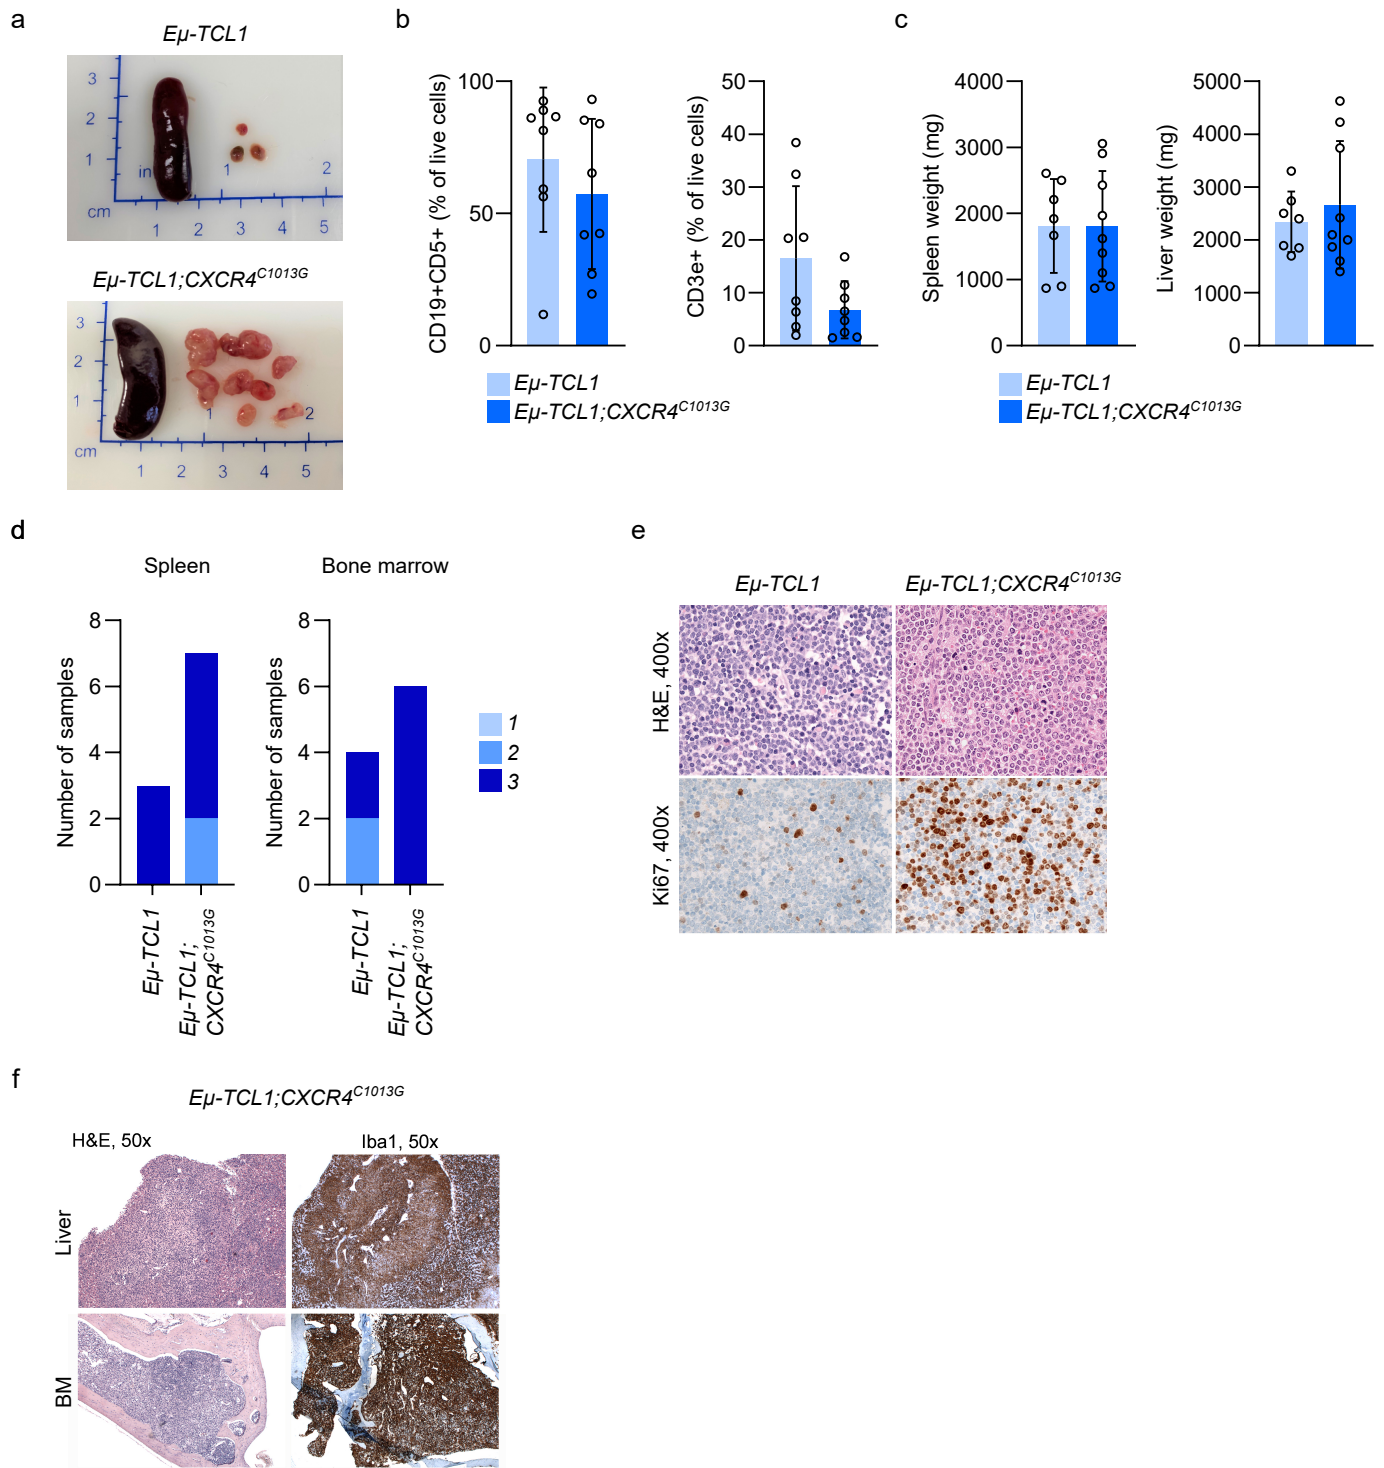

**Supplemental Figure S4. Characterization of  $E\mu$ -TCL1;CXCR4<sup>C1013G</sup> with symptomatic CLL requiring euthanasia.**

(a) Representative images of spleen and lymphatic tissue of mice with symptomatic CLL requiring euthanasia of a  $E\mu$ -TCL1 control and a  $E\mu$ -TCL1;CXCR4<sup>C1013G</sup> animal presenting with extensive lymphadenopathy.

(b) Frequencies of spleen CD19+CD5+ and CD3e+ cells by flow cytometry in mice with symptomatic CLL requiring euthanasia ( $E\mu$ -TCL1, n = 8;  $E\mu$ -TCL1;CXCR4<sup>C1013G</sup>, n = 8).

(c) Spleen and liver weight of mice with symptomatic CLL requiring euthanasia ( $E\mu$ -TCL1, n = 7;  $E\mu$ -TCL1;CXCR4<sup>C1013G</sup>, n = 9).

(d) Quantification of histology scores (1-3) of spleen ( $E\mu$ -TCL1, n = 3;  $E\mu$ -TCL1;CXCR4<sup>C1013G</sup>, n = 7) and bone marrow ( $E\mu$ -TCL1, n = 4;  $E\mu$ -TCL1;CXCR4<sup>C1013G</sup>, n = 6) of mice with symptomatic CLL requiring euthanasia. Scoring system details are shown in Supplemental Methods.

(e) Representative images of aggressive lymphoma morphology in  $E\mu$ -TCL1;CXCR4<sup>C1013G</sup> animals compared to  $E\mu$ -TCL1 animals with symptomatic CLL requiring euthanasia.

(f) Representative images of histiocytic sarcoma in  $E\mu$ -TCL1;CXCR4<sup>C1013G</sup> animals.

Statistical analyses were performed with Student's t test (b and c) or Mann-Whitney U test (d), \* P < 0.05, \*\* P < 0.01. Error bars indicate standard deviation (SD).
