# Supplementary material for: CXCR4 hyperactivation cooperates with TCL1 in CLL development and aggressiveness
Source: PubMed Central journal article supplement (PMC8478649; doi:10.1038/s41375-021-01376-1), 2021-08-06
Supplement: 41375_2021_1376_MOESM6_ESM.pdf [file 41375_2021_1376_MOESM6_ESM.pdf]

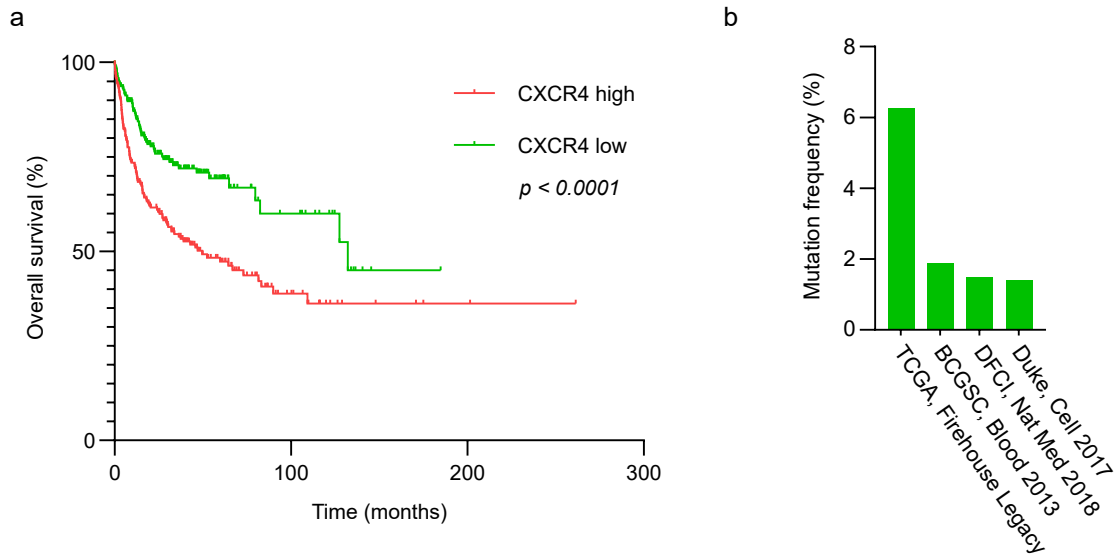

**Supplemental Figure S5. Association of CXCR4 expression with survival and frequency of CXCR4 mutations in DLBCL patients.**

(a) Kaplan-Meier survival analysis of 420 DLBCL Patients stratified by CXCR4 mRNA expression of GSE10846 (22), risk-group maximized and analyzed with SurvExpress (21). P value of log-rank (Mantel-Cox) test is shown.

(b) Mutation frequency of CXCR4 in DLBCL patient datasets (TCGA, Firehouse Legacy, n = 48; BCGSC, Blood 2013, n = 53; CDFCI, Nat Med 2018, n = 135; Duke, Cell 2017, n = 1001) (16, 17, 23).
