# Supplementary material for: CXCR4 hyperactivation cooperates with TCL1 in CLL development and aggressiveness
Source: PubMed Central journal article supplement (PMC8478649; doi:10.1038/s41375-021-01376-1), 2021-08-06
Supplement: 41375_2021_1376_MOESM8_ESM.pdf [file 41375_2021_1376_MOESM8_ESM.pdf]

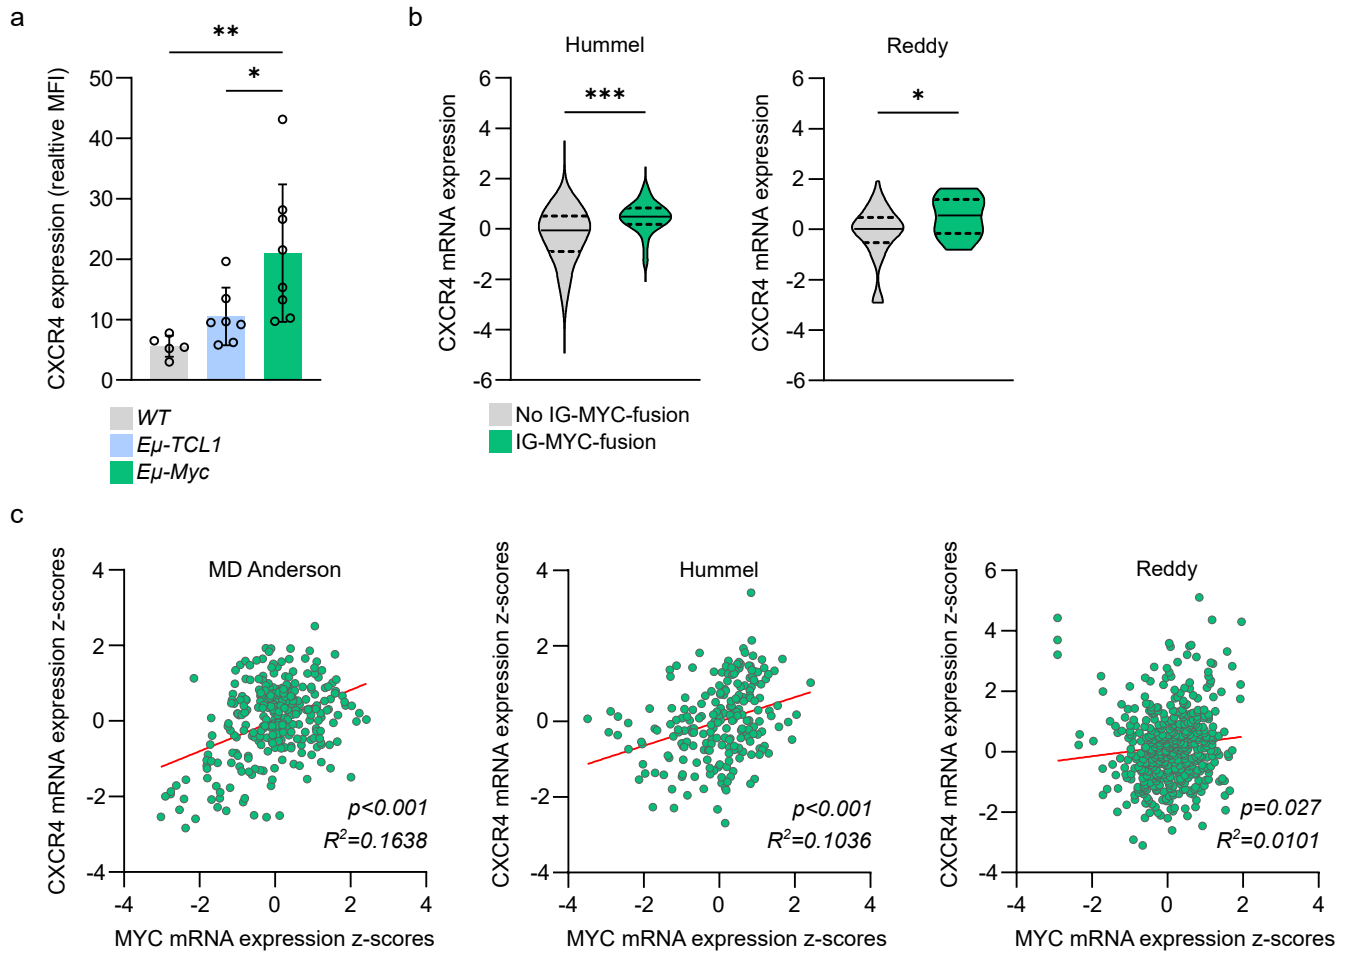

**Supplemental Figure S7. CXCR4 surface and transcript expression is regulated by MYC.**

(a) CXCR4 expression of tumors (*Eμ-Myc*,  $n = 8$ ; *Eμ-TCL1*,  $n = 7$ ) compared with healthy B cells from adult *WT* mice ( $n = 5$ ), relative to isotype by flow cytometry.

(b) Correlation of CXCR4 mRNA expression dependent of IG-MYC fusion status from the Hummel data set (GSE4475) (24) (IG-MYC-fusion,  $n = 59$ ; no IG-MYC-fusion  $n = 141$ , samples not annotated and samples with MYC translocations other than IG excluded) and the Reddy data set (16) (IG-MYC-fusion,  $n = 12$ ; no IG-MYC-fusion,  $n = 80$ ).

(c) Correlation of MYC mRNA and CXCR4 mRNA expression as log Z-scores relative to all samples in the MD Anderson Cancer Center data set (25), analyzed with cBioPortal (26, 27) ( $n = 286$ ), the Hummel data set (GSE4475) (24) ( $n = 221$ ) and the Reddy data set (16) ( $n = 482$ ).

Statistical analyses were performed with one-way ANOVA with Tukey correction for multiple comparisons (a), Student's t-test (b) and Pearson correlation (c), \*  $P < 0.05$ , \*\*  $P < 0.01$ , \*\*\*  $P < 0.001$ . Error bars indicate standard deviation (SD).
