# Supplementary material for: CXCR4 hyperactivation cooperates with TCL1 in CLL development and aggressiveness
Source: PubMed Central journal article supplement (PMC8478649; doi:10.1038/s41375-021-01376-1), 2021-08-06
Supplement: 41375_2021_1376_MOESM9_ESM.pdf [file 41375_2021_1376_MOESM9_ESM.pdf]

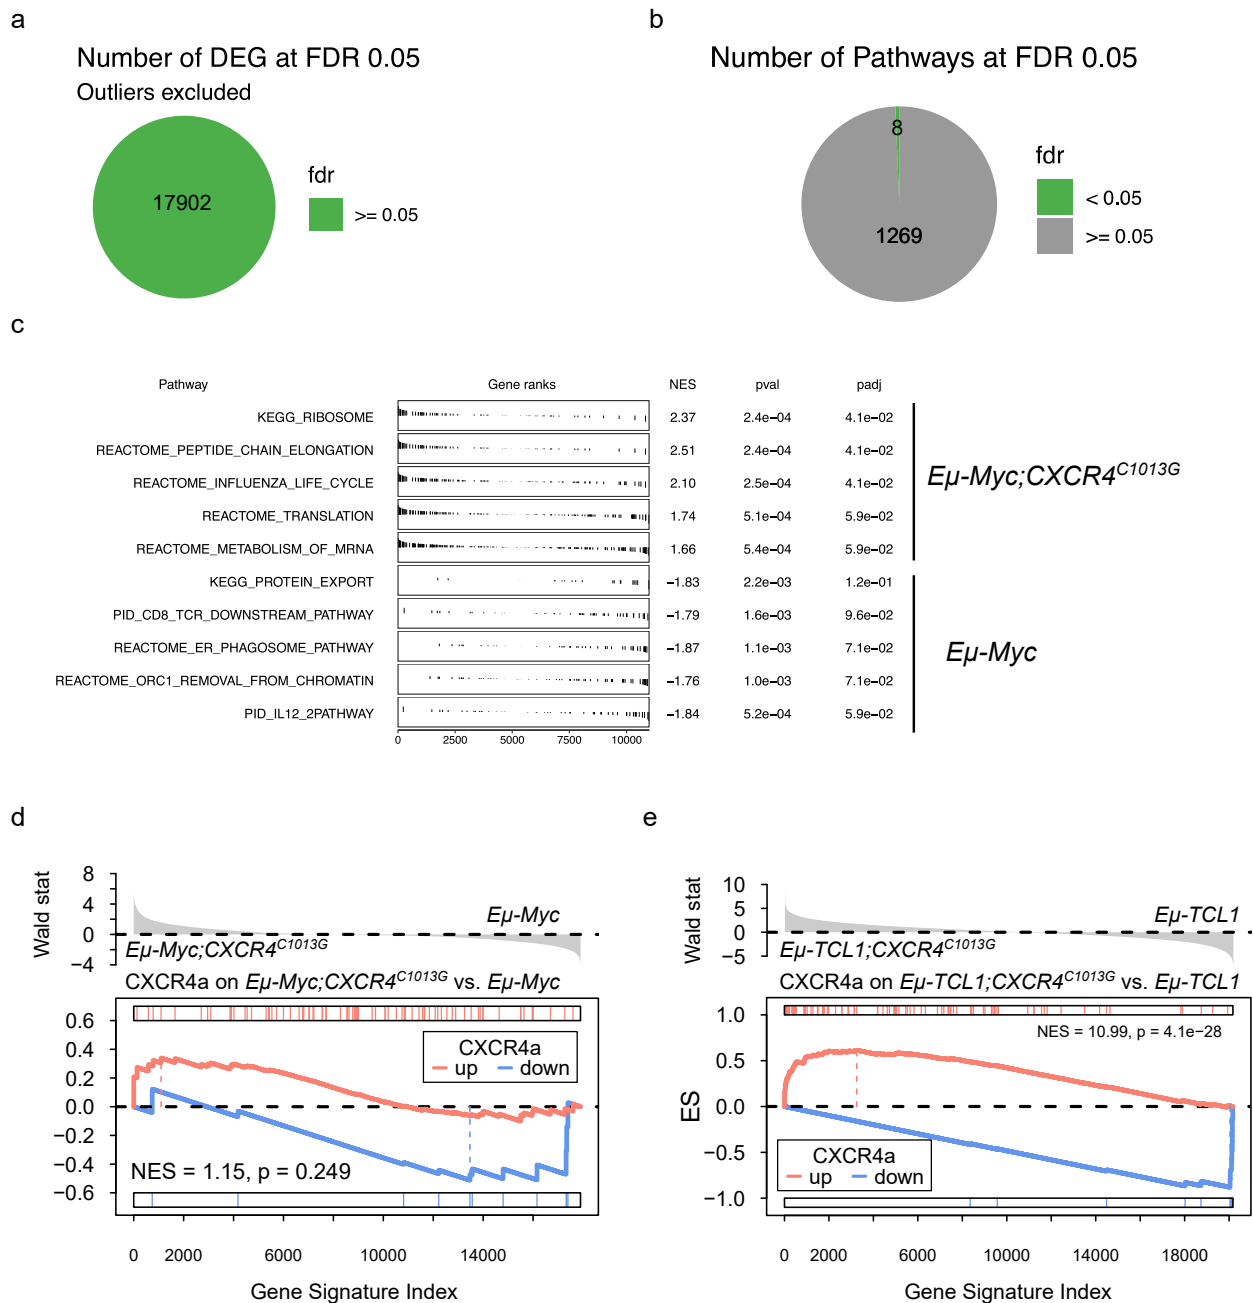

**Supplemental Figure S8. RNA sequencing of *Eμ-Myc* and *Eμ-Myc;CXCR4<sup>C1013G</sup>* lymphoma cells.**

- (a) DEG in *Eμ-Myc* (n = 6) vs. *Eμ-Myc;CXCR4<sup>C1013G</sup>* (n = 6).  
 (b) GSEA for curated gene sets listed in MsigDB (7, 8) in *Eμ-Myc* vs. *Eμ-Myc;CXCR4<sup>C1013G</sup>*.  
 (c) GSEA for curated gene sets listed in MsigDB (7, 8) in *Eμ-Myc* vs. *Eμ-Myc;CXCR4<sup>C1013G</sup>* CD19+ B cells showing normalized enrichment scores (NES) P value(pval) and adjusted P value (padj).  
 (d) GSEA showing CXCR4a enrichment in *Eμ-Myc;CXCR4<sup>C1013G</sup>* vs. *Eμ-Myc*.  
 (e) GSEA showing CXCR4a enrichment in *Eμ-TCL1;CXCR4<sup>C1013G</sup>* vs. *Eμ-TCL1*.
