# Supplementary material for: CXCR4 hyperactivation cooperates with TCL1 in CLL development and aggressiveness
Source: PubMed Central journal article supplement (PMC8478649; doi:10.1038/s41375-021-01376-1), 2021-08-06
Supplement: 41375_2021_1376_MOESM10_ESM.pdf [file 41375_2021_1376_MOESM10_ESM.pdf]

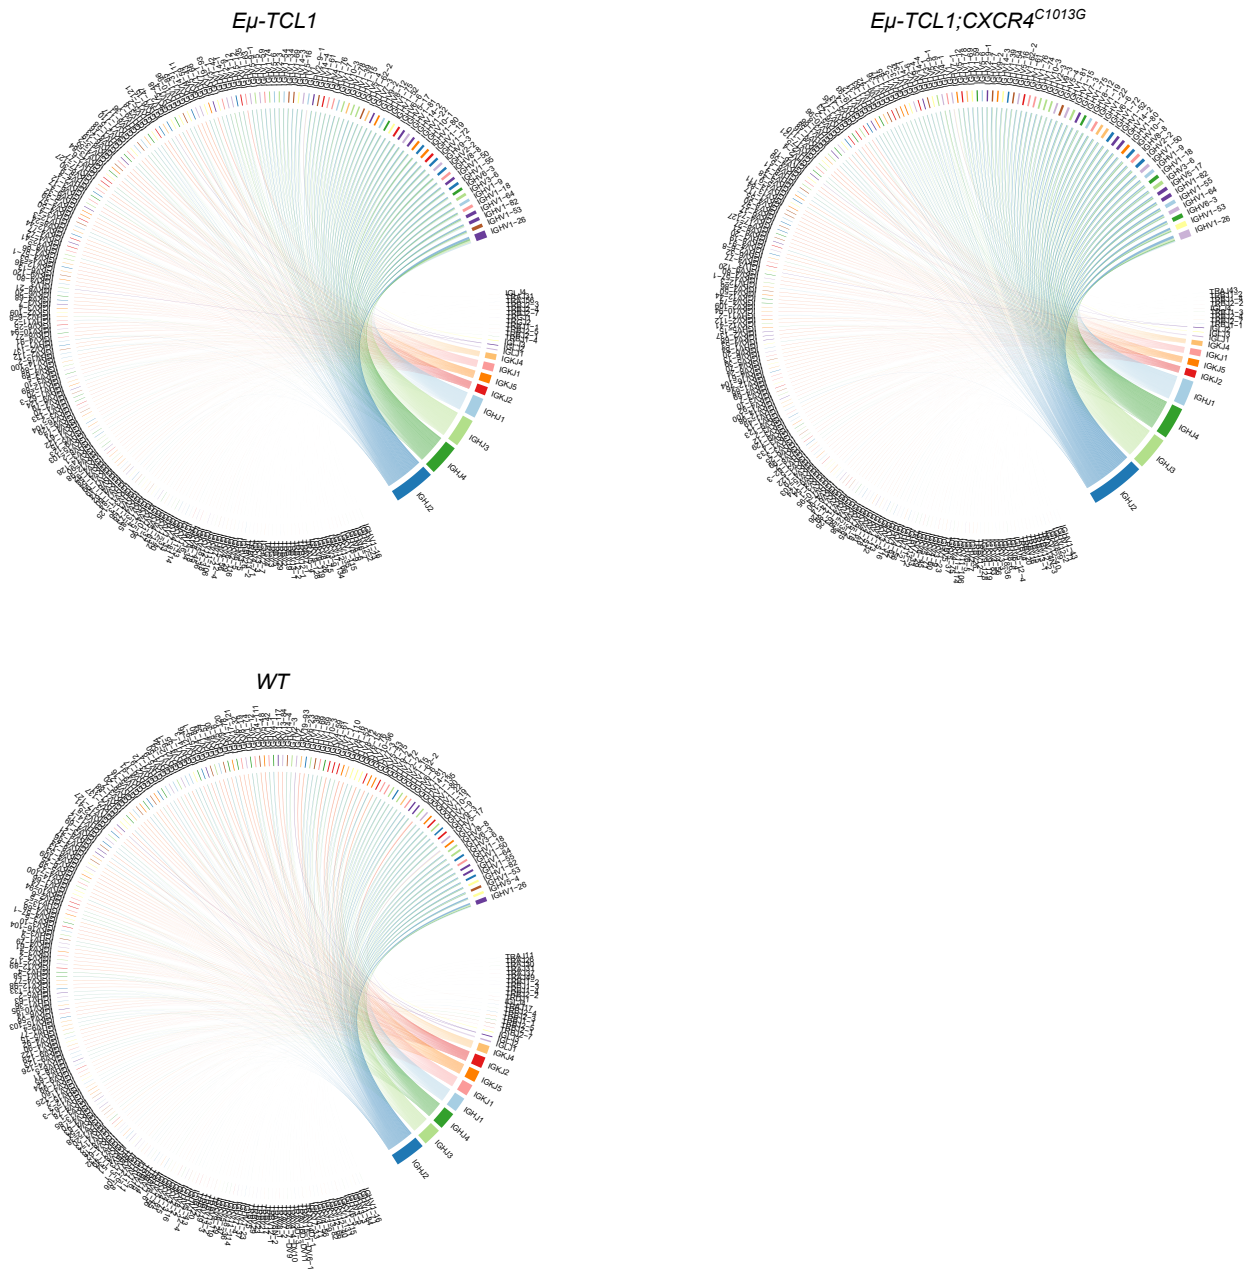

**Supplemental Figure S9. Transcriptomic clonality analysis of CD19+ B cells in 6 week old mice.** Representative circos plots of V(D)J-rearrangement of CD19+ B cells of 6 week old mice (*Eμ-TCL1*, n = 5; *Eμ-TCL1;CXCR4<sup>C1013G</sup>*, n = 5; *WT*, n = 5).
