# Supplementary material for: CXCR4 hyperactivation cooperates with TCL1 in CLL development and aggressiveness
Source: PubMed Central journal article supplement (PMC8478649; doi:10.1038/s41375-021-01376-1), 2021-08-06
Supplement: 41375_2021_1376_MOESM11_ESM.pdf [file 41375_2021_1376_MOESM11_ESM.pdf]

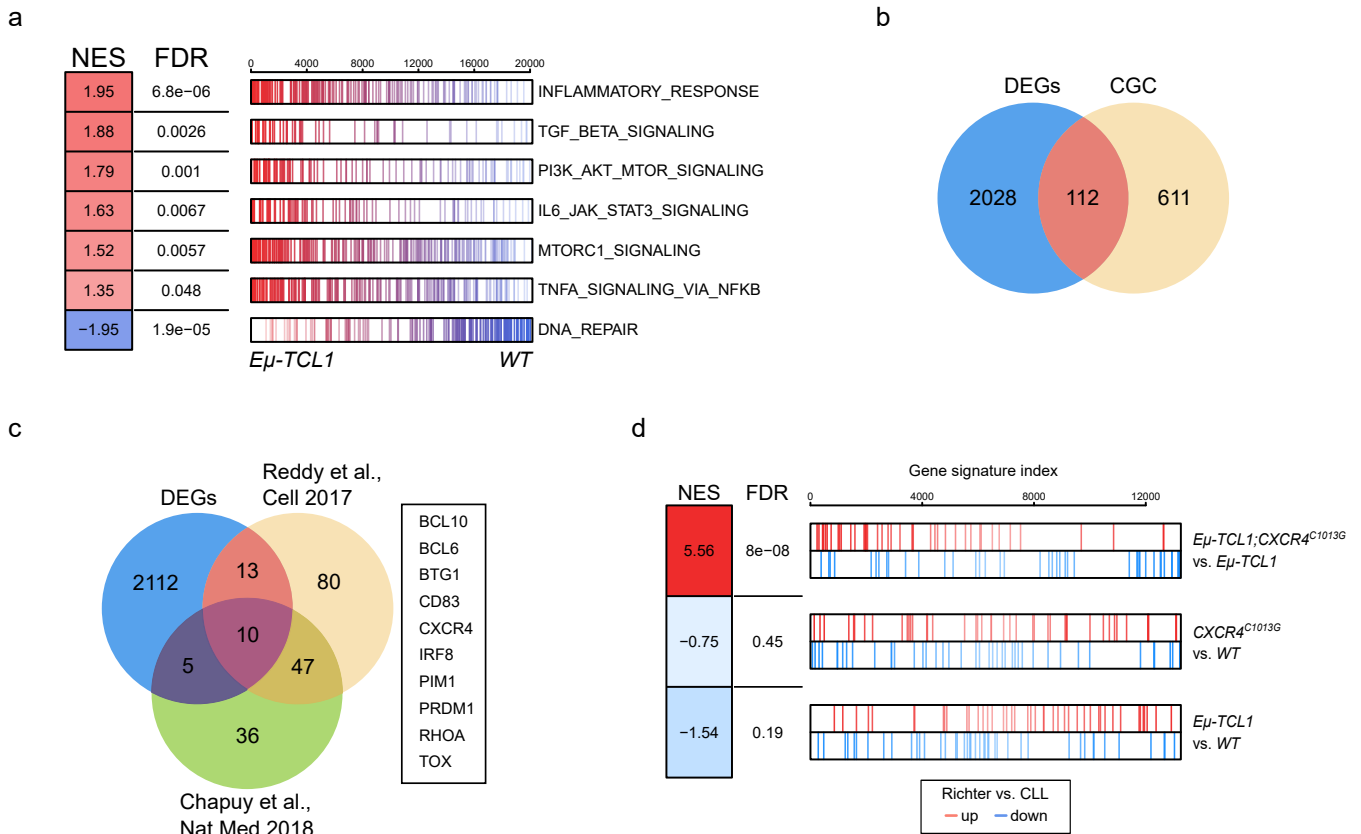

**Supplemental Figure S10. Investigating the transcriptomic program of B cells from *Eμ-TCL1;CXCR4<sup>C1013G</sup>* mice.**

- (a) GSEA of *Eμ-TCL1* vs. *WT* CD19+ B cells showing normalized enrichment scores (NES) and false discovery rates (FDR) for curated gene sets listed in MsigDB (7, 8).
- (b) Overlap of DEG with  $\text{padj} < 0.05$  of *Eμ-TCL1;CXCR4<sup>C1013G</sup>* vs. *Eμ-TCL1* CD19+ B cells with the Cancer Gene Census (CGC) (15).
- (c) Overlap of DEG with  $\text{padj} < 0.05$  of *Eμ-TCL1;CXCR4<sup>C1013G</sup>* vs. *Eμ-TCL1* CD19+ B cells with DLBCL drivers in patient datasets (16, 17).
- (d) GSEA showing enrichment of a Richter's transformation signature in *Eμ-TCL1;CXCR4<sup>C1013G</sup>* vs. *WT*, *Eμ-TCL1* vs. *WT* and *CXCR4<sup>C1013G</sup>* vs. *WT* CD19+ B cells showing normalized enrichment scores (NES) and false discovery rates (FDR).
